# Supplementary material for: Surgeons’ Attitudes About Use of Preoperative Risk Assessment Tools
Source: Research Square preprint supplement (doi:10.21203/rs.3.rs-1075088/v1), 2021-11-16
Supplement: Supplementary file 1 [file 6d3d1d7a08fecef783821bc6.docx]

**Appendix 1**. Survey Emailed to Surgeons.

Understanding Attitudes Towards and Techniques of Surgical Preoperative Risk Assessment

The results of this survey will be used in the development of a computer-based risk assessment tool for patients considering surgical options.

1. What is your surgical specialty?

- Cardiac
- General
- Gynecologic
- Neurological
- Orthopedic
- Other (please specify): ___
- Otolaryngologic
- Plastic
- Thoracic
- Urologic
- Vascular

2. How many years have you been in practice after completing post-graduate clinical training? _____

3 What is your gender?

- Male
- Female
- Other
- I prefer not to answer

4. What is your age? ______

5. What graduate or doctoral degrees have you obtained? (please check all that apply)

- MD
- DO
- DNP
- PhD
- MBA
- MPH
- MS
- MSN
- PA-C
- Other (please specify): ___

6. Which option best describes your primary workplace?

- Academic Hospital
- Urban Community Hospital
- Rural Hospital
- Other (please specify): ___

7. What is the bed size of your hospital?

- 0-199
- 200-399
- 400-599 (Denver Health)
- 600-799 (University of Colorado Hospital)
- 800+

8. How often do you discuss the operative risk with your patient preoperatively?

- Never (0%)
- Rarely (1-24%)
- Sometimes (25-49%)
- Most of the time (50-74%)
- Always (75-100%)

9. How often do you use each of the following methods of risk assessment & communication? (Please choose one for each method)

|  | Never (0%) | Rarely (1-24%) | Sometimes (25-49%) | Most of the time (50-74%) | Always (75-100%) |
| --- | --- | --- | --- | --- | --- |
| Pre-anesthesia clinic (e.g. Pre-procedure services) |  |  |  |  |  |
| Face to face communication |  |  |  |  |  |
| Phone call |  |  |  |  |  |
| Rely on resident to communicate risk |  |  |  |  |  |
| Rely on Advanced Practice Provider (NP, PA) to communicate risk |  |  |  |  |  |
| Handout/Pamphlet |  |  |  |  |  |
| Class/Video |  |  |  |  |  |

10. When you discuss risk with a patient, about how much time do you usually spend?

- I do not spend any time
- 1-4 minutes
- 5-9 minutes
- 10-14 minutes
- >15 minutes

11. How often do you or your team communicate patient preoperative risk information to the patient's referring provider or primary care provider?

- Never (0%)
- Rarely (1-24%)
- Sometimes (25-49%)
- Most of the time (50-74%)
- Always (75-100%)

12. When you are evaluating a patient for surgery, what do you use for your source of risk information?

|  | Never (0%) | Rarely (1-24%) | Sometimes (25-49%) | Most of the time (50-74%) | Always (75-100%) |
| --- | --- | --- | --- | --- | --- |
| Online risk calculator (e.g. ACS Surgical Risk Calculator) |  |  |  |  |  |
| Prior experience |  |  |  |  |  |
| Assessment of current literature |  |  |  |  |  |
| Other |  |  |  |  |  |

12b. If you chose "Other" please specify the risk assessment tool(s) you utilize. _____________

13. When are you more likely to use a risk assessment tool?

|  | No | Yes |
| --- | --- | --- |
| Patient age >65 |  |  |
| Patient asks about risk |  |  |
| Patient has significant risk factors |  |  |
| To dissuade patient/family from surgery |  |  |
| Emergent operation |  |  |

14. What operative risk assessment tool features would be useful to your surgical team in a risk assessment tool?

|  | Not useful at all | Somewhat useful | Very useful | Extremely useful | Don’t know |
| --- | --- | --- | --- | --- | --- |
| Prediction of good surgical outcome |  |  |  |  |  |
| Prediction of minor complications |  |  |  |  |  |
| Prediction of major complications |  |  |  |  |  |
| Prediction of mortality |  |  |  |  |  |
| Automatic integration of risk factors from EHR |  |  |  |  |  |
| Automatic recording of results into the EHR |  |  |  |  |  |
| Prediction of post-surgery infection |  |  |  |  |  |

15. How much of a barrier is each of the following factors to using a formal risk assessment tool?

|  | Not a barrier | A small barrier | A moderate barrier | A significant barrier |
| --- | --- | --- | --- | --- |
| The amount of time it takes to use |  |  |  |  |
| The inability of the risk calculator to integrate with the EHR |  |  |  |  |
| The inability of patients to understand the results |  |  |  |  |
| The inaccessibility of risk assessment tool during patient visits |  |  |  |  |
| Trust of risk tool accuracy |  |  |  |  |
| Native language of patient |  |  |  |  |

16. To be entered into a raffle for a $50 Amazon gift card, please enter your email address. Incomplete surveys will not be considered in the raffle. ___________________

Thank you for your participation in completing this survey. We greatly appreciate your time and help with this project.
